# Supplementary material for: Electroencephalography-Based Brain–Machine Interfaces in Older Adults: A Literature Review
Source: MDPI journal article supplement (doi:10.3390/bioengineering10040395), 2023-03-23
Supplement: s1 [file s1]

Systematic Review

# Electroencephalography-Based Brain–Machine Interfaces in Older Adults: A Literature Review

Luca Mesin <sup>1,\*</sup>, Giuseppina Elena Cipriani <sup>2</sup> and Martina Amanzio <sup>2</sup>

<sup>1</sup> Mathematical Biology and Physiology, Department Electronics and Telecommunications, Politecnico di Torino, 10129 Turin, Italy

<sup>2</sup> Department of Psychology, Università di Torino, 10124 Torin, Italy

\* Correspondence: luca.mesin@polito.it; Tel.: +39-0110-904-085

## Supplementary material

References of the excluded studies and reasons for the exclusion are listed in Table S1. A summary of the results and perspectives of the selected papers is shown in Table S2

**Citation:** Mesin, L.; Cipriani, G.E.; Amanzio, M. Electroencephalography-Based Brain–Machine Interfaces in Older Adults: A Literature Review. *Bioengineering* **2022**, *10*, 395. <https://doi.org/10.3390/bioengineering10040395>

Academic Editor: Mark L.Weiss

Received: 30 January 2023

Accepted: 21 March 2023

Published: 23 March 2023

**Publisher’s Note:** MDPI stays neutral with regard to jurisdictional claims in published maps and institutional affiliations.

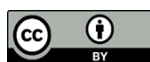

**Copyright:** © 2022 by the authors. Submitted for possible open access publication under the terms and conditions of the Creative Commons Attribution (CC BY) license (<https://creativecommons.org/licenses/by/4.0/>).

**Table S1.** Excluded studies and reasons for the exclusion.

| Reference and Reason for Exclusion                                        |                      |
|---------------------------------------------------------------------------|----------------------|
| Schnakers C et al. Front Hum Neurosci. 2022;16:971315                     | not original article |
| Engemann DA et al. Neuroimage. 2022;262:119521                            | inadequate topic     |
| Liu B et al. Sci Data. 2022;9(1):252                                      | inadequate topic     |
| Belkacem AN et al. Front Hum Neurosci. 2022;16:881922                     | not original article |
| Massetti N et al. J Alzheimers Dis. 2022;85(4):1639-1655                  | wrong procedure      |
| Sponheim C et al. J Neural Eng. 2021;18(6)                                | wrong age group      |
| Rahman MM et al. Comput Biol Med. 2021;136:104696.                        | not original article |
| Di Marco R et al. Methods Protoc. 2021;4(3):48                            | wrong age group      |
| Schmitz S. Front Sociol. 2021;6:651486                                    | not original article |
| Smith R et al. Sci Rep. 2021;11(1):10128.                                 | wrong age group      |
| Pavlov AN et al. Sensors (Basel). 2020;20(20):5843.                       | not original article |
| Belkacem AN et al. Front Neurosci. 2020;14:692                            | not original article |
| Marquez-Chin C et al. Biomed Eng Online. 2020;19(1):34                    | not original article |
| Cell. 2020;181(1):22-23                                                   | wrong age group      |
| Welle EJ et al. J Neural Eng. 2020;17(2):026037                           | inadequate topic     |
| Ali JI et al. J Int Neuropsychol Soc. 2020;26(1):31-46                    | not original article |
| Tang W et al. Artif Intell Med. 2020;102:101755.                          | wrong age group      |
| Sepúlveda P et al. Anaesthesia. 2020;75(2):196-201                        | wrong age group      |
| Shim S et al. Biomed Mater Eng. 2020;30(5-6):497-507                      | wrong species        |
| Kang YN et al. IEEE Trans Neural Syst Rehabil Eng. 2019;27(6):1312-1319   | inadequate topic     |
| Martins NRB et al. Front Neurosci. 2019; 13:112                           | wrong age group      |
| Beveridge R et al. IEEE Trans Neural Syst Rehabil Eng. 2019;27(4):572-581 | wrong age group      |
| Classen S et al. 2019;39(2):97-107                                        | not original article |
| Woods V et al. J Neural Eng. 2018;15(6):066024                            | wrong species        |
| Luo J et al. J Neural Eng. 2018;15(5):056015                              | wrong age group      |
| Norton JJS et al. J Neural Eng. 2018;15(5):056012                         | wrong age group      |
| Semprini M et al. Front Neurol. 2018;9:21                                 | not original article |
| Brockmann PE et al. Eur J Paediatr Neurol. 2018;22(3):434-439             | wrong age group      |
| Fu TM et al. Proc Natl Acad Sci U S A. 2017;114(47):E10046-E10055         | wrong species        |
| Jiang Y et al. Front Aging Neurosci. 2017;9:52                            | not original article |
| Rana M et al. Front Aging Neurosci. 2016;8:239                            | not original article |
| Young KL et al. Accid Anal Prev. 2017;106:460-467                         | not original article |
| Kober SE et al. Neurobiol Aging. 2016;40:127-137                          | wrong age group      |
| Wagner J et al. J Neurosci. 2016;36(7):2212-26                            | wrong age group      |
| Murphy MD et al. Front Cell Neurosci. 2016;9:497                          | not original article |
| Hsu HT et al. IEEE Trans Neural Syst Rehabil Eng. 2016;24(5):603-15       | wrong age group      |
| Reichert JL et al. Int J Psychophysiol. 2016;99:67-78                     | inadequate topic     |
| Goodman G et al. J Integr Neurosci. 2015;14(3):281-93                     | wrong age group      |
| Tseng KC et al. Sensors (Basel). 2015;15(3):5518-30                       | wrong age group      |
| Reichert JL et al. Clin Neurophysiol. 2015;126(11):2068-77                | wrong age group      |

---

|                                                                                 |                      |
|---------------------------------------------------------------------------------|----------------------|
| McCane LM et al. Clin Neurophysiol. 2015;126(11):2124-31                        | wrong age group      |
| Gomez-Pilar J et al. Annu Int Conf IEEE Eng Med Biol Soc. 2014;2014:3630-3      | not original article |
| Nuyujukian P et al. J Neural Eng. 2014;11(6):066003                             | wrong species        |
| Young BM et al. Expert Rev Med Devices. 2014;11(6):537-9                        | not original article |
| Di Pino G et al. Front Syst Neurosci. 2014;8:109                                | not original article |
| Mandal HS et al. Acta Biomater. 2014;10(6):2446-54                              | inadequate topic     |
| Ninaus M et al. Front Hum Neurosci. 2013;7:914                                  | wrong age group      |
| Guggenmos DJ et al. Proc Natl Acad Sci USA. 2013;110(52):21177-82               | wrong age group      |
| Aloise F et al. Clin EEG Neurosci. 2011;42(4):219-24                            | wrong age group      |
| Li Y et al. PLoS One. 2011;6(6):e20801                                          | wrong age group      |
| Contreras-Vidal JL et al. Annu Int Conf IEEE Eng Med Biol Soc. 2010;2010:2825-8 | not original article |
| Allison B et al. IEEE Trans Neural Syst Rehabil Eng. 2010;18(2):107-16          | wrong age group      |
| Lin CT et al. Gerontology. 2010;56(1):112-9                                     | not original article |

---

**Table S2.** Results and perspectives of the papers fitting our selection criteria.

| Reference                     | Results                                                                                                                                                                                                                                                                                                                                                   | Perspectives                                                                                                                                                                                                                                                                                                              |
|-------------------------------|-----------------------------------------------------------------------------------------------------------------------------------------------------------------------------------------------------------------------------------------------------------------------------------------------------------------------------------------------------------|---------------------------------------------------------------------------------------------------------------------------------------------------------------------------------------------------------------------------------------------------------------------------------------------------------------------------|
| Li et al., 2022 [7]           | Older adults are less affected by the degree of cognitive fatigue during MI, compared to young participants.                                                                                                                                                                                                                                              | BCI-MI in the older population needs not to be based on SMR alone and the appropriate algorithms can be applied without obvious lateralization of ERD.                                                                                                                                                                    |
|                               | Nevertheless, MI energy is lower in the older population, than in younger people.                                                                                                                                                                                                                                                                         | CNN model based on fused spatial information greatly improves classification accuracy and leads to longer training time.                                                                                                                                                                                                  |
| Goelz et al., 2021 [8]        | The results confirm an age-related reorganization of brain networks and show a correlation with task characteristics. Electrophysiological brain activity patterns associated with altered sensorimotor network in older adults, suggesting reorganization of task-related brain networks.                                                                | Future research on BCI applications should consider age-related differences in the development of BCI and NF systems when targeting the older population (e.g., in the selection of appropriate features and algorithms).                                                                                                 |
|                               | Decreased cortical lateralization of the somatosensory cortex and overall reduction in EEG power in older subjects. This resulted in lower accuracy of BCI classification based on spatial activation information. Older subjects showed less lateralization in somatosensory cortex in response to vibro-tactile stimulation compared to younger adults. | Future studies should focus on the effects of ageing on EEG signals.                                                                                                                                                                                                                                                      |
| Chen et al., 2019 [9]         |                                                                                                                                                                                                                                                                                                                                                           | In addition, NFT methods to improve cortical lateralization and algorithms not based solely on EEG lateralization should be investigated.                                                                                                                                                                                 |
|                               |                                                                                                                                                                                                                                                                                                                                                           | These age-related EEG changes reflected greater susceptibility to noise and interference.                                                                                                                                                                                                                                 |
| Zich et al., 2017 [10]        | Brain activity patterns show lower lateralization of ERD % and HbR concentration during MI, but not ME, in older subjects compared with younger participants.                                                                                                                                                                                             | Age-related changes in MI should be taken into account when designing MI NF protocols for patients. The influence of age must be considered in the design of neuro-rehabilitation protocols for stroke patients. Complex relationship between age and exercise-related activity in both EEG and hemodynamic measurements. |
|                               |                                                                                                                                                                                                                                                                                                                                                           | Future studies should focus on tactile BCI development, considering specific stimulation design, individual characteristics and training.                                                                                                                                                                                 |
| Herweg et al., 2016 [11]      | Tactile BCI performance is valuable although age-related changes in somatosensory abilities are negligible.                                                                                                                                                                                                                                               | Tactile BCIs can be a valid alternative to visual and auditory tasks. They can be used despite age-related changes in somatosensory abilities.                                                                                                                                                                            |
|                               | The protocol enabled learning and significantly improved BCI performance and EEG characteristics, demonstrating the positive effect of training.                                                                                                                                                                                                          |                                                                                                                                                                                                                                                                                                                           |
| Gomez-Pilar et al., 2016 [12] | Usefulness of NF training with a motor imagery-based BCI in terms of improvements in all cognitive functions except attention.                                                                                                                                                                                                                            | This study may be helpful in the development of new NF training based on MI strategies, useful in rehabilitating cognitive functions by improving brain plasticity and neuropsychological functions, which seems to affect the older population.                                                                          |
|                               |                                                                                                                                                                                                                                                                                                                                                           | A multivariate approach provides better discrimination than classical non-person-specific models,                                                                                                                                                                                                                         |
| Karch et al., 2015 [13]       | WM load and spatial attentional focus could be distinguished in all age comparison groups based on EEG responses in alpha range.                                                                                                                                                                                                                          | at both the individual and group levels.                                                                                                                                                                                                                                                                                  |
|                               |                                                                                                                                                                                                                                                                                                                                                           | BCI-based intervention showed promising results                                                                                                                                                                                                                                                                           |
| Lee et al., 2015 [14]         | Improvements in attention and delayed memory before and after CT. No significant changes observed in immediate memory and visuospatial/constructive areas.                                                                                                                                                                                                | in improving memory and attention. This intervention could potentially reduce or prevent cognitive decline                                                                                                                                                                                                                |
|                               |                                                                                                                                                                                                                                                                                                                                                           |                                                                                                                                                                                                                                                                                                                           |

---

|                       |                                                                                                                            |                                                                                                                                                                                                                                                                                                   |
|-----------------------|----------------------------------------------------------------------------------------------------------------------------|---------------------------------------------------------------------------------------------------------------------------------------------------------------------------------------------------------------------------------------------------------------------------------------------------|
| Lee et al., 2013 [15] | Significant improvements in immediate memory, visuospatial/constructive, attention and delayed memory before and after CT. | <p>in patients with mild or major neurocognitive disorders.</p> <p>BCI-based intervention showed promising results in improving memory and attention. This intervention could potentially reduce or prevent cognitive decline</p> <p>in patients with mild or major neurocognitive disorders.</p> |
|-----------------------|----------------------------------------------------------------------------------------------------------------------------|---------------------------------------------------------------------------------------------------------------------------------------------------------------------------------------------------------------------------------------------------------------------------------------------------|

---
